# Supplementary material
Source: PubMed Central journal article supplement (PMC5278749)

**Supplemental Table 1.** Baseline demographics, clinical characteristics, and outcomes of entire cohort

|                                               | <b>N = 211</b> |
|-----------------------------------------------|----------------|
| <b>Demographics</b>                           |                |
| Age, years                                    | 59 (48 – 67)   |
| Male sex                                      | 126 (59.7)     |
| Race                                          |                |
| African American                              | 140 (66.4)     |
| Caucasian                                     | 54 (25.6)      |
| Hispanic/Latino                               | 1 (0.5)        |
| Other                                         | 16 (7.6)       |
| Hospital System                               |                |
| Detroit Medical Center                        | 136 (65.5)     |
| UF Health – Shands Hospital                   | 38 (18.0)      |
| Henry Ford Hospital                           | 37 (17.5)      |
| <b>Comorbidities and past medical history</b> |                |
| Prior hospitalization (1 year)                | 129 (61.1)     |
| Prior surgery (30 days)                       | 32 (15.2)      |
| Prior antibiotics (90 days)                   | 51 (24.2)      |
| Prior MRSA infection, (1 year)                | 36 (17.1)      |
| Obesity                                       | 70 (33.2)      |
| Diabetes mellitus                             | 77 (36.5)      |
| Chronic kidney disease                        | 64 (30.3)      |
| Chronic hemodialysis                          | 40 (19.0)      |
| Liver disease                                 | 34 (16.1)      |
| Intravenous drug user                         | 37 (17.5)      |
| Cerebrovascular accident                      | 11 (5.2)       |
| COPD                                          | 50 (23.7)      |
| Heart failure                                 | 60 (28.4)      |
| Malignancy                                    | 15 (7.1)       |
| HIV/AIDS                                      | 12 (5.7)       |
| Neutropenia <sup>a</sup>                      | 7 (3.3)        |
| Charlson comorbidity index                    | 3 (2-6)        |
| <b>Clinical characteristics</b>               |                |
| Intensive care unit <sup>b</sup>              | 70 (33.2)      |
| APACHE II <sup>b</sup>                        | 16 (11-20)     |

|                                       | <b>N = 211</b> |
|---------------------------------------|----------------|
| Lower respiratory tract source        | 69 (32.7)      |
| Infective endocarditis source         | 49 (23.2)      |
| Bone/joint source                     | 45 (21.3)      |
| Intravenous catheter source           | 31 (14.7)      |
| Skin/soft tissue source               | 17 (8.1)       |
| Other source                          | 38 (18.0)      |
| Polymicrobial BSI                     | 19 (9.0)       |
| Vancomycin-susceptible <sup>c</sup>   | 208 (98.6)     |
| Daptomycin-susceptible <sup>c,d</sup> | 187 (95.4)     |
| Ceftaroline-susceptible <sup>e</sup>  | 155 (98.1)     |
| BSI duration pre-ceftaroline, days    | 5 (3-9)        |
| <b>Treatment information</b>          |                |
| Infectious diseases consult           | 189 (93.1)     |
| Source control pursued                | 75 (36.4)      |
| Vancomycin prior directed therapy     | 184 (87.2)     |
| Daptomycin prior directed therapy     | 86 (40.8)      |
| Ceftaroline dosing frequency          |                |
| Every 8 hours                         | 108 (51.2)     |
| Every 12 hours                        | 95 (45.0)      |
| Every 24 hours                        | 8 (3.8)        |
| Ceftaroline dose                      |                |
| 600 mg                                | 129 (61.1)     |
| 400 mg                                | 30 (14.2)      |
| 300 mg                                | 15 (7.1)       |
| 200 mg                                | 37 (17.5)      |
| Ceftaroline inpatient duration, days  | 11 (5 – 15)    |
| Ceftaroline line of therapy           |                |
| Ceftaroline initial directed therapy  | 8 (3.8)        |
| Ceftaroline second directed therapy   | 111 (52.6)     |
| Ceftaroline third directed therapy    | 79 (37.4)      |
| Ceftaroline fourth directed therapy   | 13 (6.2)       |
| Combination therapy                   | 46 (21.8)      |
| Common reasons to use ceftaroline     |                |
| Perceived failure of prior therapy    | 102 (48.3)     |
| Elevated vancomycin MIC               | 47 (22.3)      |
| Adverse reaction of prior therapy     | 24 (11.4)      |

|                                                     | <b>N = 211</b> |
|-----------------------------------------------------|----------------|
| Pulmonary coverage                                  | 27 (12.8)      |
| Polymicrobial infection/extend spectrum of activity | 15 (7.1)       |
| Unknown/not documented                              | 20 (9.5)       |
| <b>Outcomes</b>                                     |                |
| Clinical success                                    | 153 (72.5)     |
| In hospital mortality                               | 40 (19.0)      |
| Cleared BSI on ceftaroline                          | -              |
| BSI duration, days                                  | 5 (3-9)        |
| BSI duration post-ceftaroline initiation, days      | -              |
| Length of stay post-BSI, days                       | 16 (12-26.75)  |
| Length of stay post-ceftaroline, days               | 11 (7-19)      |
| Inpatient adverse drug                              |                |
| Clostridium difficile infection                     | 6 (2.8)        |
| Rash                                                | 7 (3.3)        |
| Neutropenia <sup>f</sup>                            | 3 (1.4)        |

Data presented as n (%) or median (IQR)

Abbreviations: UF, University of Florida; MRSA, methicillin-resistant *Staphylococcus aureus*; COPD, chronic obstructive pulmonary disease; HIV, human immunodeficiency virus; AIDS, acquired immunodeficiency syndrome; APACHE, acute physiology and chronic health evaluation; BSI, bloodstream infection; MIC, minimum inhibitory concentration

<sup>a</sup> Defined as absolute neutrophil count < 500 cells/mm<sup>3</sup> at ceftaroline initiation

<sup>b</sup> At time of index culture

<sup>c</sup> Susceptibility determined by Microscan, Vitek 2, BD Phoenix, or Etest.

<sup>d</sup> Daptomycin susceptibility available for 196 patients

<sup>e</sup> Ceftaroline susceptibility determined by Etest for 158

<sup>f</sup> Defined as decrease in neutrophil count to < 1,500 cells/mm<sup>3</sup> or > 50% decrease from baseline (first dose ceftaroline) if baseline ≤ 1,500 cells/mm<sup>3</sup>

**Supplemental Table 2.** Bivariate comparisons of patients in efficacy population experiencing clinical success or clinical failure

|                                                 | <b>Failure<br/>N = 40</b> | <b>Success<br/>N = 86</b> | <b>P value</b> |
|-------------------------------------------------|---------------------------|---------------------------|----------------|
| Age, years                                      | 60 (47 – 66)              | 57 (45 – 68)              | 0.821          |
| Male sex                                        | 20 (50.0)                 | 50 (58.1)                 | 0.392          |
| Race                                            |                           |                           | 0.046          |
| African American                                | 21 (52.5)                 | 65 (75.6)                 | 0.010          |
| Caucasian                                       | 17 (42.5)                 | 17 (19.8)                 | 0.007          |
| Hispanic/Latino                                 | 0 (0.0)                   | 1 (1.2)                   | -              |
| Other                                           | 2 (5.0)                   | 3 (3.5)                   | 0.652          |
| Hospital System                                 |                           |                           | 0.634          |
| Detroit Medical Center                          | 24 (60.0)                 | 59 (68.6)                 |                |
| UF Health – Shands Hospital                     | 11 (27.5)                 | 19 (22.1)                 |                |
| Henry Ford Hospital                             | 5 (12.5)                  | 8 (9.3)                   |                |
| <b>Comorbidities &amp; past medical history</b> |                           |                           |                |
| Prior hospitalization (1 year)                  | 24 (60.0)                 | 47 (54.7)                 | 0.573          |
| Prior surgery (30 days)                         | 6 (15.0)                  | 13 (15.1)                 | 0.986          |
| Prior antibiotics (90 days)                     | 9 (22.5)                  | 24 (27.9)                 | 0.521          |
| Prior MRSA infection, (1 year)                  | 7 (17.5)                  | 13 (15.1)                 | 0.733          |
| Obesity                                         | 17 (42.5)                 | 30 (36.1)                 | 0.497          |
| Diabetes mellitus                               | 14 (35.0)                 | 33 (38.4)                 | 0.716          |
| Chronic kidney disease                          | 12 (30.0)                 | 22 (25.6)                 | 0.603          |
| Chronic hemodialysis                            | 8 (20.0)                  | 18 (20.9)                 | 0.904          |
| Liver disease                                   | 8 (20.0)                  | 12 (14.0)                 | 0.387          |
| Intravenous drug user                           | 5 (12.5)                  | 19 (22.1)                 | 0.202          |
| Cerebrovascular accident                        | 3 (7.5)                   | 5 (5.8)                   | 0.708          |
| COPD                                            | 10 (25.0)                 | 19 (22.1)                 | 0.718          |
| Heart failure                                   | 10 (25.0)                 | 24 (27.9)                 | 0.732          |
| Malignancy                                      | 5 (12.5)                  | 2 (2.3)                   | 0.033          |
| HIV/AIDS                                        | 0 (0.0)                   | 8 (9.3)                   | -              |
| Neutropenia <sup>b</sup>                        | 2 (5.0)                   | 1 (1.2)                   | 0.236          |
| Charlson comorbidity index                      | 3.5 (2.0 – 5.0)           | 3 (2.0 – 5.3)             | 0.824          |
| <b>Clinical characteristics</b>                 |                           |                           |                |
| Intensive care unit <sup>c</sup>                | 21 (52.5)                 | 24 (27.9)                 | 0.007          |
| APACHE II <sup>c</sup>                          | 18.5 (15.3 – 23.8)        | 15 (10.0 – 19.0)          | 0.001          |
| Lower respiratory tract source                  | 19 (47.5)                 | 22 (25.6)                 | 0.015          |
| Infective endocarditis source                   | 7 (17.5)                  | 24 (27.9)                 | 0.207          |
| Bone/joint source                               | 5 (12.5)                  | 21 (24.4)                 | 0.124          |
| Intravenous catheter source                     | 8 (20.0)                  | 12 (14.0)                 | 0.387          |
| Skin/soft tissue source                         | 2 (5.0)                   | 9 (10.5)                  | 0.500          |
| Other source                                    | 7 (17.5)                  | 15 (17.4)                 | 0.994          |
| Polymicrobial BSI                               | 5 (12.5)                  | 5 (5.8)                   | 0.287          |

|                                       | Failure<br>N = 40 | Success<br>N = 86 | P value |
|---------------------------------------|-------------------|-------------------|---------|
| Vancomycin-susceptible <sup>d</sup>   | 40 (100.0)        | 85 (98.8)         | -       |
| Daptomycin-susceptible <sup>d,e</sup> | 35 (94.5)         | 81 (97.6)         | 0.586   |
| Ceftaroline-susceptible <sup>f</sup>  | 28 (96.6)         | 66 (97.1)         | 1.000   |
| Ceftaroline MIC <sup>g</sup> , mg/L   | 0.5 (0.5 – 0.75)  | 0.5 (0.5 – 1.0)   | 0.438   |
| BSI duration pre-ceftaroline, days    | 3.5 (2.8 – 7.0)   | 3.0 (2.0 – 6.0)   | 0.284   |
| <b>Treatment information</b>          |                   |                   |         |
| Infectious diseases consult           | 36 (94.7)         | 77 (92.8)         | 1.000   |
| Source control pursued                | 12 (31.6)         | 30 (36.1)         | 0.624   |
| Vancomycin prior directed therapy     | 32 (80.0)         | 75 (87.2)         | 0.292   |
| Daptomycin prior directed therapy     | 18 (45.0)         | 30 (34.9)         | 0.276   |
| Ceftaroline dosing frequency          |                   |                   | 0.753   |
| Every 8 hours                         | 19 (47.5)         | 47 (54.7)         |         |
| Every 12 hours                        | 19 (47.5)         | 35 (40.7)         |         |
| Every 24 hours                        | 2 (5.0)           | 4 (4.7)           |         |
| Ceftaroline dose                      |                   |                   | 0.037   |
| 600 mg                                | 17 (42.5)         | 59 (68.6)         | 0.005   |
| 400 mg                                | 10 (25.0)         | 9 (10.5)          | 0.034   |
| 300 mg                                | 5 (12.5)          | 6 (7.0)           | 0.307   |
| 200 mg                                | 8 (20.0)          | 12 (14.0)         | 0.387   |
| Combination therapy                   | 13 (32.5)         | 24 (27.9)         | 0.598   |
| Combination with daptomycin           | 11 (27.5)         | 17 (19.8)         | 0.331   |
| Combination with vancomycin           | 1 (2.5)           | 2 (2.3)           | 1.000   |
| Combination with gentamicin           | 1 (2.5)           | 2 (2.3)           | 1.000   |
| Combination with rifampin             | 0 (0.0)           | 5 (5.8)           | -       |

Data presented as n (%) or median (IQR)

Abbreviations: UF, University of Florida; MRSA, methicillin-resistant *Staphylococcus aureus*; COPD, chronic obstructive pulmonary disease; HIV, human immunodeficiency virus; AIDS, acquired immunodeficiency syndrome; APACHE, acute physiology and chronic health evaluation; BSI, bloodstream infection; MIC, minimum inhibitory concentration

<sup>a</sup> Blood cultures not cleared prior to first dose of ceftaroline.

<sup>b</sup> Defined as < 500 cells/mm<sup>3</sup>.

<sup>c</sup> At time of index culture.

<sup>d</sup> Susceptibility determined by Microscan, Vitek 2, BD Phoenix, or Etest.

<sup>e</sup> Daptomycin susceptibility available for 120.

<sup>f</sup> Ceftaroline susceptibility determined by Etest for 97 patients.

<sup>g</sup> Ceftaroline minimum inhibitory concentration by Etest available for 81 patients.

**Supplemental Table 3.** Clinical success by ceftaroline dosing frequency stratified by FDA labeled renal function dose adjustment strata among efficacy population

| Renal function strata   | Every 8 hours | Every 12 hours | Every 24 hours | P value |
|-------------------------|---------------|----------------|----------------|---------|
| CrCl > 50 mL/min        | 28/39 (71.8)  | 11/17 (64.7)   | -              | 0.596   |
| CrCl 30.01 - 50 mL/min  | 8/11 (72.7)   | 10/13 (76.9)   | -              | 0.813   |
| CrCl 15 – 30 mL/min     | 3/5 (60.0)    | 5/8 (62.5)     | -              | 1.00    |
| CrCl < 15 mL/min or IHD | 8/11 (72.7)   | 9/16 (56.3)    | 4/6 (66.7)     | 0.672   |

Data presented as n/N (%)

Abbreviations: CrCl, creatinine clearance; IHD, intermittent hemodialysis

**Supplemental Figure 1.** Clinical failure by ceftaroline minimum inhibitory concentration among patients in efficacy population and known ceftaroline minimum inhibitory concentration

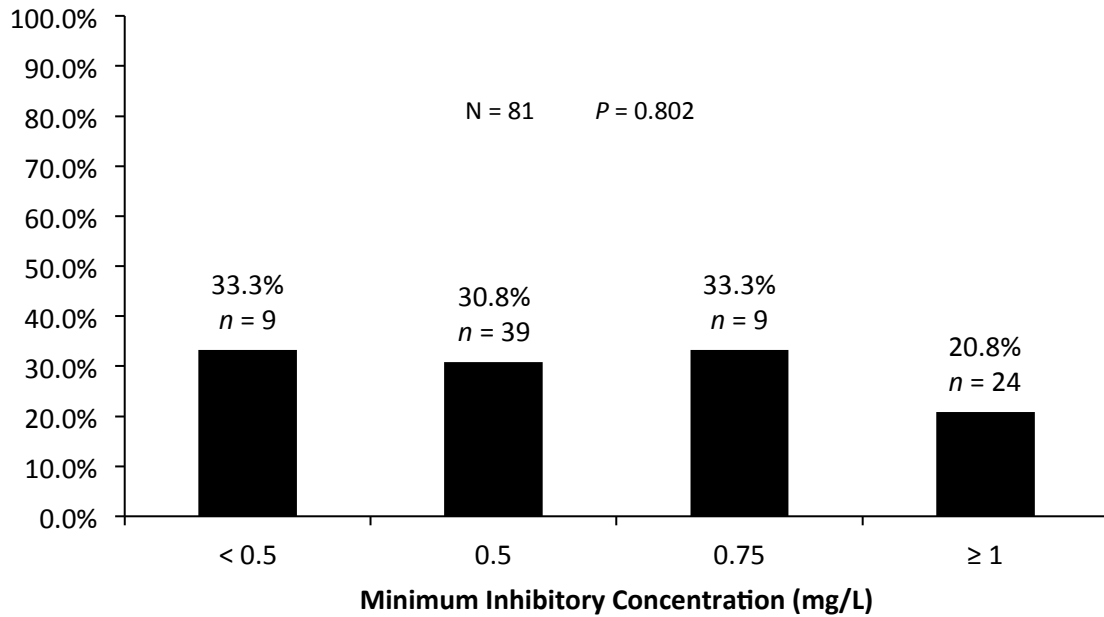

Supplement: AAC.02015-16_zac002175895s1.pdf [file AAC.02015-16_zac002175895s1.pdf]
